# Supplementary material for: Effects of auxiliary ligands of Pd(ii) dimers on induction of chiral nematic phases: chirality inversion and the photo-responsive structural change
Source: Royal Society of Chemistry journal article supplement (doi:10.1039/c4dt02812k), 2014-12-23

## Supporting Information for

### Effects of Auxiliary Ligands of Pd(II) Dimers on Induction of Chiral Nematic Phases: Chirality Inversion and Photo-responsive Structural Change

Kenji Tamura,<sup>a</sup> Jun Yoshida,<sup>b</sup> Masahiro Taniguchi,<sup>c</sup> Takafumi Kitazawa,<sup>d</sup> Akihiko Yamagishi<sup>d</sup> and Hisako Sato<sup>e\*</sup>

<sup>a</sup>National Institute of Materials Science, Tsukuba 305-0044, Japan,

<sup>b</sup>Department of Chemistry, Kitasato University, Kanagawa 112-8610, Japan.

<sup>c</sup>Kanazawa Institute of Technology, Kanazawa 921-8501, Japan

<sup>d</sup>School of Science, Toho University, Funabashi Chiba 274-851, Japan

<sup>e</sup>Graduate School of Science and Engineering, Ehime University, Matsuyama 790-8577, Japan, Fax: +81-89-927-9599; Tel: +81-89-927-9599; E-mail: [sato.hisako.my@ehime-u.ac.jp](mailto:sato.hisako.my@ehime-u.ac.jp)

#### Contents

1. The <sup>1</sup>H NMR spectra (400 MHz, CDCl<sub>3</sub>) and mass analyses of Pd complexes
2. An example for the chromatographic resolution of Pd(II) complexes
3. The CD spectra of resolved Pd(II) complexes
4. The DFT calculation of UV-vis and CD spectra of [Pd(acac)<sub>2</sub>(baet)]
5. The microscope image of the texture of a liquid crystal sample
6. The microscope image of a liquid crystal sample mounted in Cano wedge
7. The comparison of molecular size between MBBA and [Pd(II)(phac)<sub>2</sub>(taet)]
8. The crystal data and the table of selected bond lengths and angles

## **S1. The $^1\text{H}$ NMR spectra (400 MHz, $\text{CDCl}_3$ ) and mass analyses of Pd complexes**

The data of chemical shift and molecular mass are given for the Pd(II) complexes prepared in the present work:

**[{Pd(II)(acac)}<sub>2</sub>(baet)].**  $\delta = 5.44$  (2H, s, CH), 2.20 (2H, m, CH), 2.10 (12H, s, CH<sub>3</sub>), 1.96 (6H, s, CH<sub>3</sub>), 2.04 (4H, d, CH<sub>2</sub>), 0.89 (12H, m, CH<sub>3</sub>);  $m/z = 346$  (calc. 346.7 for  $\text{C}_{26}\text{H}_{38}\text{O}_8^{106}\text{Pd}^{107}\text{Pd}$ ).

**[{Pd(II)(dbm)}<sub>2</sub>(baet)].**  $\delta = 7.94$  (8H, d, aromatic), 7.53 (4H, t, aromatic), 7.46 (8H, t, aromatic), 6.76 (2H, s, CH), 2.28 (2H, m, CH), 2.19 (4H, d, CH<sub>2</sub>), 2.05 (6H, s, COCH<sub>3</sub>), 0.96 (12H, m, CH<sub>3</sub>);  $m/z = 939$  (calc. 939.8 for  $\text{C}_{46}\text{H}_{46}\text{O}_8^{106}\text{Pd}^{107}\text{Pd}$ ).

**[{Pd(II)(C<sub>9</sub>-dbm)}<sub>2</sub>(baet)].**  $\delta = 7.92$  (8H, d, aromatic), 6.92 (8H, d, aromatic), 6.66 (2H, s, CH), 4.04 (8H, t, CH<sub>2</sub>), 2.28 (2H, m, CH), 2.19 (4H, d, CH<sub>2</sub>), 2.05 (6H, s, COCH<sub>3</sub>), 1.34 (80H, m, CH<sub>2</sub>), 0.96 (12H, m, CH<sub>3</sub>), 0.90 (12H, m, CH<sub>3</sub>);  $m/z = 1508$  (calc. 1508.8 for  $\text{C}_{82}\text{H}_{118}\text{O}_{12}^{106}\text{Pd}^{107}\text{Pd}$ ).

**[{Pd(II)(C<sub>8</sub>-azoacac)}<sub>2</sub>(baet)].**  $\delta = 7.95$  (8H, d, aromatic), 7.90 (8H, d, aromatic), 7.30 (8H, d, aromatic), 7.03 (8H, d, aromatic), 4.05 (8H, t, CH<sub>2</sub>), 2.22 (2H, m, CH), 1.90 (12H, s, CH<sub>3</sub>), 2.19 (4H, d, CH<sub>2</sub>), 2.01 (6H, s, COCH<sub>3</sub>), 1.34 (48H, m, CH<sub>2</sub>), 0.92 (24, m, CH<sub>3</sub>);  $m/z = 1309$  (calc. 1309.4 for  $\text{C}_{66}\text{H}_{87}\text{N}_4\text{O}_{10}^{106}\text{Pd}^{107}\text{Pd}$ ).

## S2. An example of the chromatographic resolution of Pd(II) complexes

The following is an example of chromatographic resolution in case of a mixture of *cis*- and *trans*-[Pd(C<sub>8</sub>-azoacac)]<sub>2</sub>(baet).

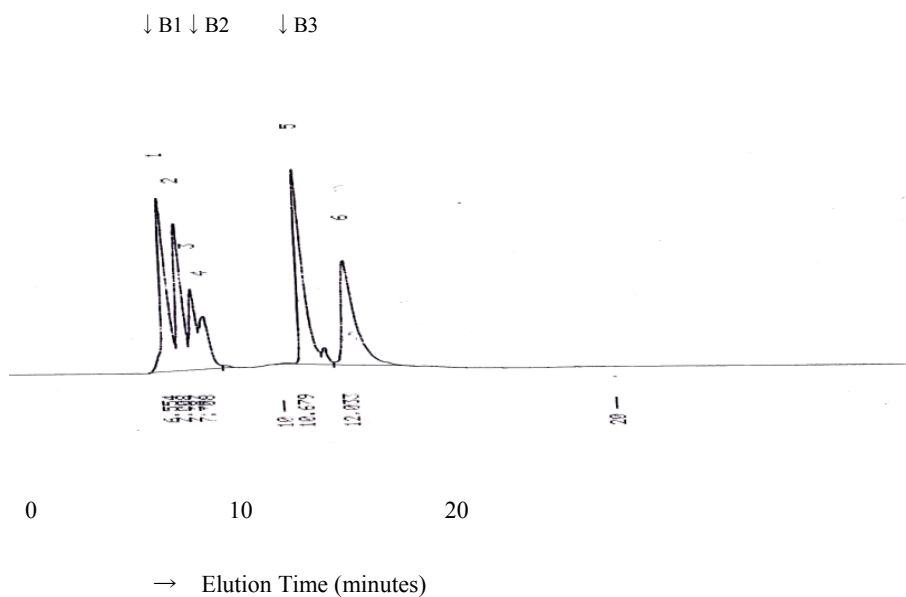

The chromatogram when a dichloromethane solution of [Pd(C<sub>8</sub>-azoacac)]<sub>2</sub>(baet) was eluted on a chiral column (Chiral Pack CI (Daicel, Japan: 0.4 cm (i.d.) × 25 cm)). Dichloromethane was flowed at a rate of 1.0 ml/min. The elution was monitored at 430 nm. The sample solution was irradiated at 460 nm before elution to give a mixture of *cis*- and *trans*-isomers. The doublet peaks at B1, B2 and B3 corresponded to the enantiomeric pairs of *trans*-, *trans*-/*cis*- and *cis*-isomers, respectively.

### S3. The CD spectra of the resolved Pd(II) complexes

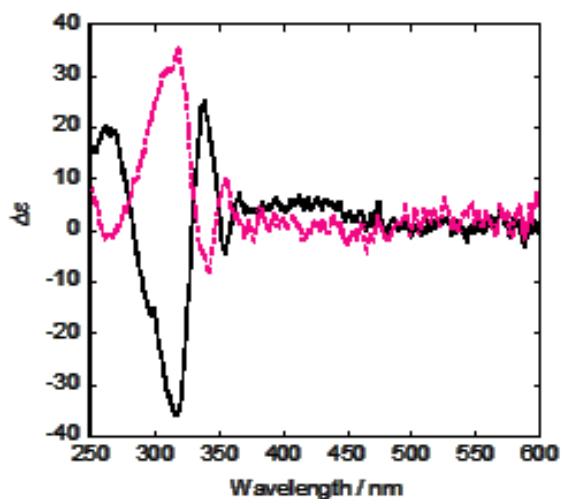

The CD spectra of the first (black) and second (red) fractions when a racemic mixture of *trans*-[Pd(C<sub>8</sub>-azoacac)<sub>2</sub>(baet)] was resolved on a chiral column. . [Pd(C<sub>9</sub>-dbm)<sub>2</sub>(baet)] and *cis*-[Pd(C<sub>8</sub>-azoacac)<sub>2</sub>(baet)] gave nearly the same spectra.

**S4. DFT calculation of UV-vis and CD spectra of  $[\{\text{Pd}(\text{acac})\}_2(\text{baet})]$**

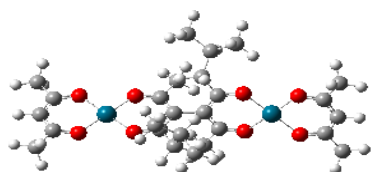

A molecular model of  $[\{\text{Pd}(\text{II})(\text{acac})\}_2(\text{baet})]$

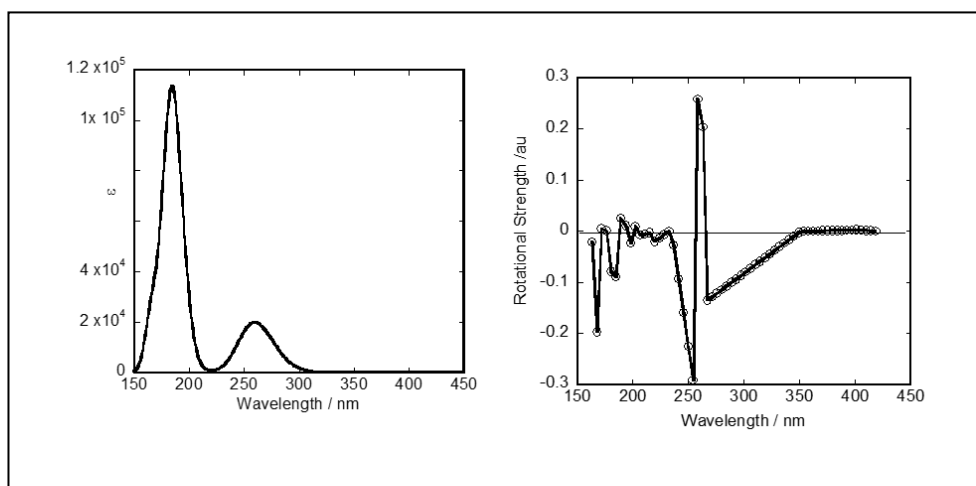

Figure S4. Calculated UV-vis (left) and CD (right) spectra of  $[\{\text{Pd}(\text{II})(\text{acac})\}_2(\text{baet})]$

**S5. The microscope image of the texture of a liquid crystal sample**

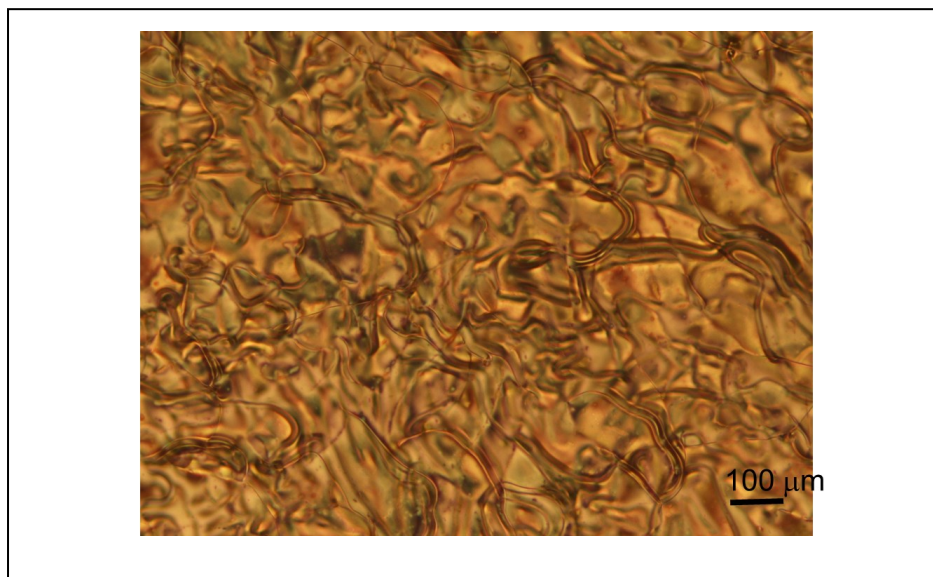

Figure S5. The cross-nicoled microscopic image of a liquid crystal sample. The sample (MBBA doped with  $[\text{Pd(II)(dbm)}_2(\text{baet})]$  at the molar ratio of 0.3 %) was sandwiched between two glass plates. Temperature was 25 °C. The sample transformed into an isotropic media (dark image) at  $39.6 \pm 0.2$  °C

### S6. The microscope image of a liquid crystal sample mounted in Cano wedge

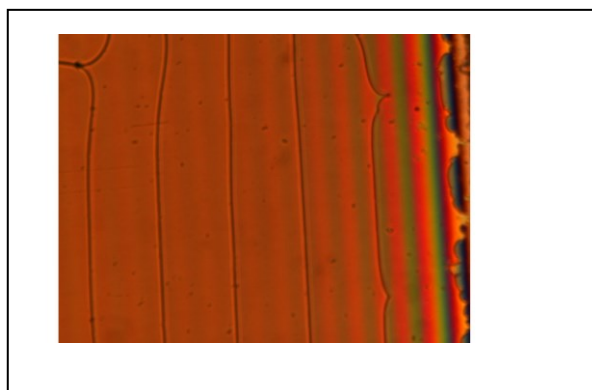

Figure S6. The microscopic image of a liquid crystal sample injected into a Cano wedge. The sample (MBBA doped with  $[\text{Pd(II)(dbm)}_2(\text{baet})]$  at the molar ratio of 0.3 %) was into a Cano wedge at 50 °C and cooled to room temperature. The lines locating with the regular spacing were defect lines, indicating the formation of a chiral nematic phase ( $N^*$ ).

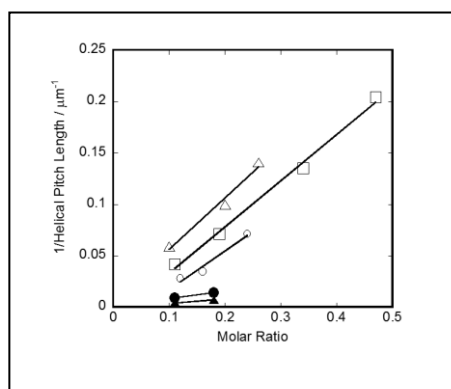

Figure S6 (b). The dependence of the inverse of helical pitch length ( $p$ ) on the molar ratio of a dopant ( $x$ ). The samples were following:  $R$ - $[\text{Pd}(\text{acac})_2(\text{baet})]$  (open circle),  $R$ - $[\text{Pd}(\text{dbm})_2(\text{baet})]$  (open square),  $R$ - $[\text{Pd}(\text{C}_9\text{-dbm})_2(\text{baet})]$  (open triangle),  $\text{trans-}R$ - $[\text{Pd}(\text{C}_8\text{-dbm})_2(\text{baet})]$  (solid circle) and  $\text{cis-}R$ - $[\text{Pd}(\text{C}_8\text{-dbm})_2(\text{baet})]$  (solid triangle).

**S7. The comparison of the molecular sizes of MBBA and [ $\text{Pd(II)(phac)}_2(\text{taet})$ ]**

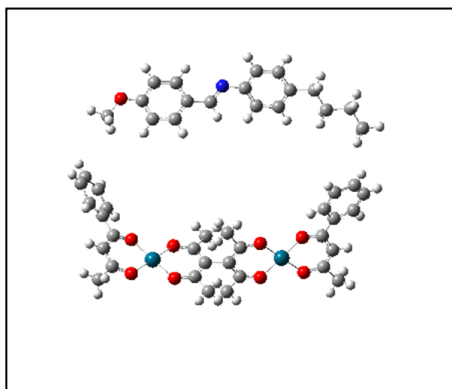

The molecular size is compared between MBBA and [ $\text{Pd(II)(phac)}_2(\text{taet})$ ], showing that their molecular length is nearly equal ( $\sim 1.5$  nm).



## **S8. The crystal data and the table of bond lengths and angles**

**Table S8 (a).** Crystallographic data for [ $\{\text{Pd(II)(acac)}_2\}$ (baet)].

| <b>Compound</b>                                                                                    | <b>[<math>\{\text{Pd(II)(acac)}_2\}</math>(baet)]</b>          |
|----------------------------------------------------------------------------------------------------|----------------------------------------------------------------|
| Formula                                                                                            | C <sub>26</sub> H <sub>38</sub> O <sub>8</sub> Pd <sub>2</sub> |
| Formula weight                                                                                     | 691.36                                                         |
| Crystal system                                                                                     | Monoclinic                                                     |
| Space group                                                                                        | <i>P</i> 2 <sub>1</sub> / <i>c</i>                             |
| <i>a</i> / Å                                                                                       | 11.1943 (10)                                                   |
| <i>b</i> / Å                                                                                       | 21.6804 (19)                                                   |
| <i>c</i> / Å                                                                                       | 11.8179 (10)                                                   |
| $\beta$ / °                                                                                        | 98.940 (1)                                                     |
| <i>V</i> / Å <sup>3</sup>                                                                          | 2833.3 (4)                                                     |
| <i>Z</i>                                                                                           | 4                                                              |
| <i>T</i> / K                                                                                       | 120                                                            |
| <i>D</i> <sub>x</sub> / Mg m <sup>-3</sup>                                                         | 1.621                                                          |
| Dimensions / mm                                                                                    | 0.52, 0.44, 0.26                                               |
| $\mu$ (Mo-K $\alpha$ ) / mm <sup>-1</sup>                                                          | 1.31                                                           |
| F(000)                                                                                             | 1400                                                           |
| Reflections collected                                                                              | 31569                                                          |
| Unique reflections                                                                                 | 6506                                                           |
| Reflections with <i>I</i> > 2 $\sigma$ ( <i>I</i> )                                                | 6075                                                           |
| Parameters                                                                                         | 335                                                            |
| GOF on F <sup>2</sup>                                                                              | 1.16                                                           |
| <sup>a</sup> <i>R</i> <sub>1</sub> [ <i>F</i> <sup>2</sup> > 2 $\sigma$ ( <i>F</i> <sup>2</sup> )] | 0.028                                                          |
| <sup>b</sup> <i>wR</i> <sub>2</sub> (all data)                                                     | 0.065                                                          |

$${}^a R_1 = \Sigma(|F_o| - |F_c|) / \Sigma|F_o|, {}^b wR_2 = \{\Sigma[w(F_o^2 - F_c^2)^2] / \Sigma[w(F_o^2)^2]\}^{1/2}$$

**Table S8 (b). Selected bond lengths and angles (numbering is shown in the figure below)**

| Pd-O (Å)         | C-C (Å)           | O-Pd-O (°)          | C-C-C-C (°)              |
|------------------|-------------------|---------------------|--------------------------|
| Pd1—O1 1.980 (2) | C10—C11 1.413 (3) | O1—Pd1—O2 94.63 (8) | C10—C11—C16—C15 92.4 (3) |
| Pd1—O2 1.987 (2) | C11—C12 1.419 (3) | O3—Pd1—O4 93.01 (7) |                          |
| Pd1—O3 1.964 (2) | C11—C16 1.509 (3) | O5—Pd2—O6 92.90 (7) |                          |
| Pd1—O4 1.966 (2) | C15—C16 1.415 (3) | O7—Pd2—O8 94.78 (8) |                          |
| Pd2—O5 1.985 (2) | C16—C17 1.408 (4) |                     |                          |
| Pd2—O6 1.973 (2) |                   |                     |                          |
| Pd2—O7 1.990 (2) |                   |                     |                          |
| Pd2—O8 1.986 (2) |                   |                     |                          |

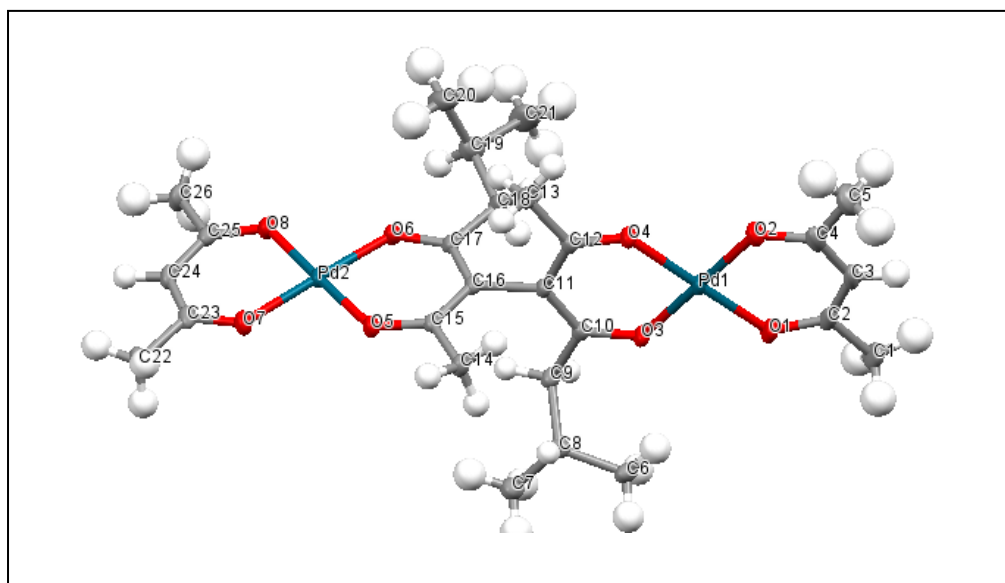

Supplement: c4dt02812k1.pdf [file c4dt02812k1.pdf]
